# Supplementary material for: EFEMP1 as a Potential Biomarker for Diagnosis and Prognosis of Osteosarcoma
Source: Hindawi journal article supplement (doi:10.1155/2020/5264265), 2020-01-01
Supplement: f1 [file 5264265.f1.pdf]

Supplementary information Standard curve for one test in the study

|    | Conc (ng/ml) | OD mean | OD1   | OD2   |
|----|--------------|---------|-------|-------|
| S1 | 0            | 0.053   | 0.048 | 0.058 |
| S2 | 1.56         | 0.0585  | 0.057 | 0.060 |
| S3 | 3.12         | 0.0705  | 0.071 | 0.070 |
| S4 | 6.25         | 0.0885  | 0.088 | 0.089 |
| S5 | 12.5         | 0.1625  | 0.160 | 0.165 |
| S6 | 25           | 0.3705  | 0.361 | 0.380 |
| S7 | 50           | 0.682   | 0.677 | 0.687 |
| S8 | 100          | 1.466   | 1.501 | 1.431 |

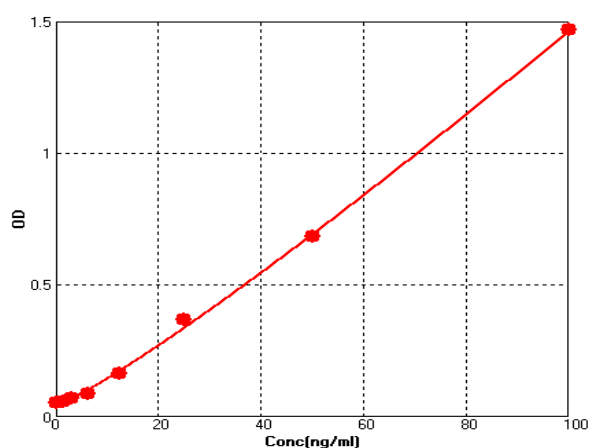

Standard curve

4 Parameter Logistic

$$y = (A - D) / [1 + (x/C)^B] + D$$

A = 85.01636  
 B = -1.13959  
 C = 3568.88171  
 D = 0.04320  
 $r^2 = 0.99901$

Supplementary Table 1 Serum EFEMP1 level for all the group of samples analyzed by the ELISA assay

| Group                                                                                                    | Median<br>(ng/ml) | Quartile<br>spacing<br>(ng/ml) | Mean<br>(ng/ml) | Standard<br>deviation<br>(SD) | Coefficient<br>of variation<br>(CV) |
|----------------------------------------------------------------------------------------------------------|-------------------|--------------------------------|-----------------|-------------------------------|-------------------------------------|
| OS group(pre-treatment)                                                                                  | 4.69              | 7.72                           | 7.61            | 8.76                          | 1.15                                |
| healthy controls                                                                                         | 0.64              | 2.52                           | 1.47            | 1.65                          | 1.12                                |
| other primary bone<br>tumor patients<br>(including<br>chondrosarcoma and<br>giant cell tumor of<br>bone) | 12.94             | 11.01                          | 12.53           | 7.56                          | 0.60                                |
| OS pre- surgery and<br>post-neoadjuvant<br>chemotherapy                                                  | 15.52             | 18.12                          | 20.18           | 13.68                         | 0.68                                |
| OS patients at < 4<br>weeks<br>post-surgery                                                              | 21.17             | 18.48                          | 22.83           | 11.92                         | 0.52                                |
| OS patients at $\geq$ 4<br>weeks<br>post-surgery                                                         | 16.80             | 12.85                          | 19.93           | 12.10                         | 0.61                                |

Supplementary Table 2 Contingency table

Contingency table of predicted and true OS diagnosis using EFEMP1 cutoff 1.51.

|           |          | Actual   |          |
|-----------|----------|----------|----------|
|           |          | Positive | Negative |
| Predicted | Positive | 45       | 22       |
|           | Negative | 6        | 47       |
